# Supplementary material for: Transcriptome signatures reveal candidate key genes in the whole blood of patients with lumbar disc prolapse
Source: PubMed Central journal article supplement — Exp Ther Med. 2019 Oct 25;18(6):4591–602. doi: 10.3892/etm.2019.8137 (PMC6862187; doi:10.3892/etm.2019.8137), 2019-10-25
Supplement: Supplementary_Data.pdf [file Supplementary_Data.pdf]

Table SI. Sequences of the primers used for PCR.

| Gene     | Sequence (5' to 3')              |
|----------|----------------------------------|
| TLR4     | F: AACAGTGGGTACAGGATGCAATT       |
|          | R: GGAGGTTTTTATTTTTCCTCTTCAGA    |
| CYP27A1  | F: TGAGCAACTCCCTCTCAGCTAAA       |
|          | R: TCTACCCAAGGACAGCAATGC         |
| PLIN5    | F: CCTTGGCCTTGACCCTTCTT          |
|          | R: CAATACCAAAAAGGTGGTCAGAGA      |
| ACSL1    | F: CTCCAGTCCCCTGTGGTTTCT         |
|          | R: GATCTGCCCTCCCGCTTACT          |
| IL1RN    | F: CCTCAGAAGGCGTCACAACA          |
|          | R: AGCATGGAGGCTGGTCAGTT          |
| TNFSF13B | F: CACCAACTATACAAAAAGGATCTTACACA |
|          | R: TTATTCTCTTTTCTTCTAGGGCACTTC   |
| PDIA4    | F: AATTTGAGGGTGGAGACAGAGATC      |
|          | R: CTCAGTTTTGTGGCATGTTCTTCT      |
| FKBP11   | F: GCCAAAAGCAGGTGATTCCA          |
|          | R: TCGCTTCTCTCCCACACACA          |
| ABLIM1   | F: TGAAACTGAGCAGGTGTGTGTTG       |
|          | R: CCACCTCCTCCTCTACACACAAG       |
| ENPP4    | F: TCCTTCTTGTGCCCATATCTGA        |
|          | R: GAAGTAAAACCCTCCAAATAAAAAGGAA  |
| SOD2     | F: GATCCACTGCAAGGAACAACAG        |
|          | R: GCGTGCTCCCACACATCA            |
| β-ACTIN  | F: CTGGAACGGTGAAGGTGACA          |
|          | R: CGGCCACATTGTGAACTTTG          |

F, forward; R, reverse; TLR4, Toll-like receptor 4; CYP27A1, cytochrome P450 family 27 subfamily A member 1; PLIN5, perilipin 5; ACSL1, acyl-CoA synthetase long-chain family member 1; TNFSF13B, tumor necrosis factor superfamily member 13b; IL1RN, interleukin 1 receptor antagonist; SOD2, superoxide dismutase 2; PDIA4, protein disulfide isomerase family A member 4; FKBP11, FKBP prolyl isomerase 11; ENPP4, ectonucleotide pyrophosphatase/phosphodiesterase 4; ABLIM1, actin-binding LIM protein 1.

Table SII. List of 161 differentially expressed genes identified in the whole blood in descending order of FC.

| Gene symbol   | Gene name                                                                          | P-value | FC   |
|---------------|------------------------------------------------------------------------------------|---------|------|
| OLFM4         | Olfactomedin 4                                                                     | 0.039   | 8.71 |
| ARG1          | Arginase 1                                                                         | 0.039   | 7.36 |
| FLJ27255      | Uncharacterized LOC401281                                                          | 0.035   | 4.93 |
| IL1R1         | Interleukin 1 receptor, type I                                                     | 0.013   | 4.27 |
| IL1R2         | Interleukin 1 receptor, type II                                                    | 0.021   | 4.21 |
| ELANE         | Elastase, neutrophil expressed                                                     | 0.017   | 3.85 |
| SIRPB2        | Signal-regulatory protein beta 2                                                   | 0.005   | 3.84 |
| SLED1         | Proteoglycan 3 pseudogene                                                          | 0.021   | 3.83 |
| PLIN4         | Perilipin 4                                                                        | 0.004   | 3.79 |
| RETN          | Resistin                                                                           | 0.027   | 3.63 |
| ANXA3         | Annexin A3                                                                         | 0.003   | 3.61 |
| CTSG          | Cathepsin G                                                                        | 0.042   | 3.59 |
| CBS           | Cystathionine-beta-synthase                                                        | 0.041   | 3.56 |
| TMIGD3        | Transmembrane and immunoglobulin domain containing 3                               | P<0.001 | 3.55 |
| MCEMP1        | Mast cell-expressed membrane protein1                                              | 0.038   | 3.43 |
| SLC11A1       | Solute carrier family 11 (proton-coupled divalent metal ion transporter), member 1 | 0.029   | 3.39 |
| HTR1B         | 5-hydroxytryptamine (serotonin) receptor 1B, G protein-coupled                     | 0.001   | 3.34 |
| FCGR1A        | Fc fragment of igg, high affinity Ia, receptor (CD64)                              | 0.027   | 3.33 |
| GPR97         | G protein-coupled receptor 97                                                      | 0.027   | 3.23 |
| NAIP          | NLR family, apoptosis inhibitory protein                                           | 0.009   | 3.19 |
| PLIN5         | Perilipin 5                                                                        | 0.017   | 3.17 |
| SMA4          | Glucuronidase, beta pseudogene                                                     | 0.007   | 3.09 |
| DKFZp667F0711 | Uncharacterized protein dkfzp667f0711                                              | 0.030   | 3.07 |

|          |                                                                                  |       |      |
|----------|----------------------------------------------------------------------------------|-------|------|
| CEACAM1  | Carcinoembryonic antigen-related cell adhesion molecule 1 (biliary glycoprotein) | 0.008 | 3.06 |
| AADACP1  | Arylacetamide deacetylase pseudogene1                                            | 0.019 | 2.95 |
| CAMP     | Cathelicidin antimicrobial peptide                                               | 0.017 | 2.92 |
| HP       | Haptoglobin                                                                      | 0.003 | 2.92 |
| AZU1     | Azurocidin 1                                                                     | 0.026 | 2.89 |
| C7orf34  | Chromosome 7 open reading frame 34                                               | 0.046 | 2.83 |
| GK       | Glycerol kinase                                                                  | 0.006 | 2.76 |
| HCRT     | Hypocretin (orexin) neuropeptide precursor                                       | 0.045 | 2.75 |
| LRG1     | Leucine-rich alpha-2-glycoprotein 1                                              | 0.008 | 2.73 |
| FFAR3    | Free fatty acid receptor 3                                                       | 0.042 | 2.73 |
| SIPA1L2  | Signal-induced proliferation-associated 1 like 2                                 | 0.011 | 2.68 |
| MGAM     | Maltase-glucoamylase (alpha-glucosidase)                                         | 0.048 | 2.66 |
| CLEC4E   | C-type lectin domain family 4, memberE                                           | 0.008 | 2.66 |
| SLPI     | Secretory leukocyte peptidase inhibitor                                          | 0.008 | 2.66 |
| TNFAIP6  | Tumor necrosis factor, alpha-induced protein 6                                   | 0.019 | 2.65 |
| HPR      | Haptoglobin-related protein                                                      | 0.004 | 2.61 |
| FAM157C  | Family with sequence similarity 157, member C                                    | 0.029 | 2.59 |
| SLC22A15 | Solute carrier family 22, member 15                                              | 0.001 | 2.58 |
| ACSL1    | Acyl-coa synthetase long-chain family member 1                                   | 0.014 | 2.56 |
| FCAR     | Fc fragment of iga, receptor for                                                 | 0.026 | 2.55 |
| WDFY3    | WD repeat and FYVE domain containing 3                                           | 0.005 | 2.54 |
| KLKB1    | Kallikrein B, plasma (Fletcher factor) 1                                         | 0.034 | 2.52 |

|            |                                                                                                               |         |      |
|------------|---------------------------------------------------------------------------------------------------------------|---------|------|
| CLEC4D     | C-type lectin domain family 4, memberD                                                                        | 0.020   | 2.52 |
| FCGR1B     | Fc fragment of igg, high affinity Ib, receptor (CD64)                                                         | 0.035   | 2.49 |
| IL1RN      | Interleukin 1 receptor antagonist                                                                             | 0.038   | 2.49 |
| SLC22A4    | Solute carrier family 22 (organic cation/zwitterion transporter), member4                                     | 0.002   | 2.48 |
| LUCAT1     | Lung cancer associated transcript 1 (non-protein coding)                                                      | 0.011   | 2.47 |
| MANSC1     | MANSC domain containing 1                                                                                     | 0.046   | 2.44 |
| CLEC18B    | C-type lectin domain family 18, member B                                                                      | 0.008   | 2.43 |
| MRVI1      | Murine retrovirus integration site 1 homolog                                                                  | 0.023   | 2.43 |
| FLOT2      | Flotillin 2                                                                                                   | 0.048   | 2.43 |
| LGALSL     | Lectin, galactoside-binding-like                                                                              | P<0.001 | 2.43 |
| SLC2A5     | Solute carrier family 2 (facilitated glucose/fructose transporter), member 5                                  | 0.025   | 2.40 |
| SLC22A31   | Solute carrier family 22, member 31                                                                           | 0.021   | 2.39 |
| RTN3       | Reticulon 3                                                                                                   | 0.017   | 2.38 |
| IRAK3      | Interleukin-1 receptor-associated kinase3                                                                     | 0.037   | 2.37 |
| ENTPD1     | Ectonucleoside triphosphate diphosphohydrolase 1                                                              | 0.041   | 2.36 |
| GK3P       | Glycerol kinase 3 pseudogene                                                                                  | 0.003   | 2.35 |
| ST6GALNAC3 | ST6 (alpha-N-acetyl-neuraminy1-2,3-beta-galactosyl-1,3)-N-acetylgalactosaminide alpha-2,6-sialyltransferase 3 | 0.037   | 2.35 |
| LIMK2      | LIM domain kinase 2                                                                                           | 0.017   | 2.34 |
| DYSF       | Dysferlin                                                                                                     | 0.028   | 2.33 |
| TMEM88     | Transmembrane protein 88                                                                                      | 0.041   | 2.33 |
| WDR5       | WD repeat domain 5                                                                                            | 0.016   | 2.32 |

|             |                                                                     |       |      |
|-------------|---------------------------------------------------------------------|-------|------|
| FBXL13      | F-box and leucine-rich repeat protein 13                            | 0.004 | 2.31 |
| HSPA6       | Heat shock 70kda protein 6 (HSP70B')                                | 0.003 | 2.31 |
| OSM         | Oncostatin M                                                        | 0.042 | 2.30 |
| B4GALT5     | UDP-Gal:betaglcnac beta 1,4-galactosyltransferase, polypeptide 5    | 0.042 | 2.27 |
| APOBEC3B    | Apolipoprotein B mrna editing enzyme, catalytic polypeptide-like 3B | 0.017 | 2.27 |
| IL1RAP      | Interleukin 1 receptor accessory protein                            | 0.043 | 2.27 |
| MAK         | Male germ cell-associated kinase                                    | 0.037 | 2.27 |
| MYBPC3      | Myosin binding protein C, cardiac                                   | 0.007 | 2.27 |
| STARD7-AS1  | STARD7 antisense RNA 1                                              | 0.008 | 2.26 |
| ARHGAP24    | Rho gtpase activating protein 24                                    | 0.036 | 2.26 |
| HIST1H2AC   | Histone cluster 1, h2ac                                             | 0.001 | 2.25 |
| PHC2        | Polyhomeotic homolog 2 (Drosophila)                                 | 0.025 | 2.25 |
| MXD3        | MAX dimerization protein 3                                          | 0.015 | 2.24 |
| HIST2H2BE   | Histone cluster 2, h2be                                             | 0.001 | 2.21 |
| AVIL        | Advillin                                                            | 0.021 | 2.21 |
| DISC1       | Disrupted in schizophrenia 1                                        | 0.041 | 2.21 |
| TLR4        | Toll-like receptor 4                                                | 0.037 | 2.20 |
| C10orf105   | Chromosome 10 open reading frame 105                                | 0.016 | 2.20 |
| FGD4        | FYVE, rhogef and PH domain containing 4                             | 0.005 | 2.20 |
| SYP-AS1     | SYP antisense RNA 1                                                 | 0.002 | 2.18 |
| C8orf60     | Chromosome 8 open reading frame 60                                  | 0.005 | 2.18 |
| CCDC147-AS1 | CCDC147 antisense RNA 1 (head to head)                              | 0.002 | 2.17 |
| DGAT2       | Diacylglycerol O-acyltransferase 2                                  | 0.045 | 2.17 |
| B3GNT5      | UDP-glcnac:betagal beta-1,3-N-acetylglucosaminyltransferase 5       | 0.002 | 2.17 |
| RASAL1      | RAS protein activator like 1 (GAP1 like)                            | 0.041 | 2.16 |
| LPAR2       | Lysophosphatidic acid receptor 2                                    | 0.009 | 2.16 |

|           |                                                                                |       |      |
|-----------|--------------------------------------------------------------------------------|-------|------|
| PLSCR1    | Phospholipid scramblase 1                                                      | 0.045 | 2.16 |
| MMRN1     | Multimerin 1                                                                   | 0.019 | 2.15 |
| DENND3    | DENN/MADD domain containing 3                                                  | 0.029 | 2.15 |
| ADM       | Adrenomedullin                                                                 | 0.010 | 2.13 |
| FFAR2     | Free fatty acid receptor 2                                                     | 0.011 | 2.13 |
| SLC8A1    | Solute carrier family 8 (sodium/calcium exchanger), member 1                   | 0.030 | 2.13 |
| C2orf88   | Chromosome 2 open reading frame 88                                             | 0.050 | 2.13 |
| MBOAT7    | Membrane bound O-acyltransferase domain containing 7                           | 0.005 | 2.12 |
| TREM1     | Triggering receptor expressed on myeloid cells 1                               | 0.008 | 2.12 |
| CYP27A1   | Cytochrome P450, family 27, subfamily A, polypeptide 1                         | 0.001 | 2.11 |
| SAT1      | Spermidine/spermine N1-acetyltransferase 1                                     | 0.011 | 2.11 |
| LILRA6    | Leukocyte immunoglobulin-like receptor, subfamily A (with TM domain), member 6 | 0.019 | 2.11 |
| ATHL1     | ATH1, acid trehalase-like 1 (yeast)                                            | 0.023 | 2.10 |
| SMIM1     | Small integral membrane protein 1 (Vel blood group)                            | 0.013 | 2.10 |
| SLC2A3    | Solute carrier family 2 (facilitated glucose transporter), member 3            | 0.022 | 2.09 |
| CACNA1E   | Calcium channel, voltage-dependent, R type, alpha 1E subunit                   | 0.024 | 2.09 |
| ADAM8     | ADAM metallopeptidase domain 8                                                 | 0.008 | 2.09 |
| AFF1      | AF4/FMR2 family, member 1                                                      | 0.004 | 2.09 |
| HCG27     | HLA complex group 27 (non-protein coding)                                      | 0.021 | 2.08 |
| DISC1-IT1 | DISC1 intronic transcript 1 (non-protein coding)                               | 0.024 | 2.08 |
| CYSTM1    | Cysteine-rich transmembrane module                                             | 0.040 | 2.08 |

---

|          |                                                                                          |       |      |
|----------|------------------------------------------------------------------------------------------|-------|------|
|          | containing 1                                                                             |       |      |
| NCF1     | Neutrophil cytosolic factor 1                                                            | 0.004 | 2.07 |
| USF1     | Upstream transcription factor 1                                                          | 0.018 | 2.07 |
| MSRB2    | Methionine sulfoxide reductase B2                                                        | 0.006 | 2.06 |
| IGSF9    | Immunoglobulin superfamily, member9                                                      | 0.008 | 2.04 |
| NAMPT    | Nicotinamide<br>phosphoribosyltransferase                                                | 0.015 | 2.04 |
| NCF1B    | Neutrophil cytosolic factor 1B<br>pseudogene                                             | 0.001 | 2.04 |
| MPZL1    | Myelin protein zero-like 1                                                               | 0.030 | 2.02 |
| LRRK2    | Leucine-rich repeat kinase 2                                                             | 0.005 | 2.02 |
| FCGR2B   | Fc fragment of igg, low affinity iib,<br>receptor (CD32)                                 | 0.009 | 2.02 |
| FAM71F2  | Family with sequence similarity 71,<br>member F2                                         | 0.007 | 2.01 |
| NT5C2    | 5'-nucleotidase, cytosolic II                                                            | 0.019 | 2.01 |
| TNFSF13B | Tumor necrosis factor (ligand)<br>superfamily, member 13b                                | 0.035 | 2.01 |
| KCNJ15   | Potassium channel, inwardly rectifying<br>subfamily J, member 15                         | 0.022 | 2.01 |
| BCL6     | B-cell CLL/lymphoma 6                                                                    | 0.034 | 2.01 |
| CSF2RB   | Colony stimulating factor 2 receptor,<br>beta, low-affinity (granulocyte-<br>macrophage) | 0.039 | 2.00 |
| ITM2C    | Integral membrane protein 2C                                                             | 0.016 | 0.50 |
| SLC4A4   | Solute carrier family 4 (sodium<br>bicarbonate cotransporter), member 4                  | 0.024 | 0.50 |
| B3GAT1   | Beta-1,3-glucuronyltransferase 1                                                         | 0.049 | 0.50 |
| TIMD4    | T-cell immunoglobulin and mucin<br>domain containing 4                                   | 0.023 | 0.49 |
| CHD6     | Chromodomain helicase DNA binding<br>protein 6                                           | 0.037 | 0.49 |
| MGC24103 | Uncharacterized MGC24103                                                                 | 0.037 | 0.49 |

---

|            |                                                                                                 |       |      |
|------------|-------------------------------------------------------------------------------------------------|-------|------|
| KANK1      | KN motif and ankyrin repeat domains 1                                                           | 0.025 | 0.49 |
| CDCA5      | Cell division cycle associated 5                                                                | 0.036 | 0.48 |
| PMEPA1     | Prostate transmembrane protein,<br>androgen induced 1                                           | 0.004 | 0.48 |
| NOG        | Noggin                                                                                          | 0.023 | 0.47 |
| KRT86      | Keratin 86, type II                                                                             | 0.005 | 0.47 |
| NUF2       | NUF2, NDC80 kinetochore complex<br>component                                                    | 0.002 | 0.47 |
| SCAMP5     | Secretory carrier membrane protein 5                                                            | 0.008 | 0.47 |
| OIP5       | Opa interacting protein 5                                                                       | 0.025 | 0.47 |
| GPR125     | G protein-coupled receptor 125                                                                  | 0.001 | 0.46 |
| RNF157-AS1 | RNF157 antisense RNA 1                                                                          | 0.004 | 0.46 |
| ZMAT4      | Zinc finger, matrin-type 4                                                                      | 0.025 | 0.45 |
| SYNGR3     | Synaptogyrin 3                                                                                  | 0.026 | 0.44 |
| CUX2       | Cut-like homeobox 2                                                                             | 0.010 | 0.43 |
| CCNB1      | Cyclin B1                                                                                       | 0.021 | 0.43 |
| CD38       | CD38 molecule                                                                                   | 0.033 | 0.43 |
| SLC1A7     | Solute carrier family 1 (glutamate<br>transporter), member 7                                    | 0.020 | 0.43 |
| ERAP2      | Endoplasmic reticulum<br>aminopeptidase2                                                        | 0.029 | 0.43 |
| BIRC5      | Baculoviral IAP repeat containing 5                                                             | 0.034 | 0.42 |
| HPDL       | 4-hydroxyphenylpyruvate dioxygenase-<br>like                                                    | 0.002 | 0.39 |
| TXNDC5     | Thioredoxin domain containing 5<br>(endoplasmic reticulum)                                      | 0.033 | 0.39 |
| IGJ        | Immunoglobulin J polypeptide, linker<br>protein for immunoglobulin alpha and<br>mu polypeptides | 0.038 | 0.35 |
| S100B      | S100 calcium binding protein B                                                                  | 0.023 | 0.34 |
| MZB1       | Marginal zone B and B1 cell-specific<br>protein                                                 | 0.033 | 0.33 |
| SCARA5     | Scavenger receptor class A, member 5                                                            | 0.006 | 0.31 |



---

|       |                                       |       |      |
|-------|---------------------------------------|-------|------|
| NLRP7 | NLR family, pyrin domain containing 7 | 0.003 | 0.27 |
| MYOM2 | Myomesin 2                            | 0.014 | 0.18 |
| CCR9  | Chemokine (C-C motif) receptor 9      | 0.003 | 0.13 |

---

The original signal value was log2-normalized for the statistical analysis. FC, fold change.
